# Supplementary material for: Cultivable endophytic fungal community associated with the karst endemic plant Nervilia fordii and their antimicrobial activity
Source: PubMed Central journal article supplement (PMC9730403; doi:10.3389/fmicb.2022.1063897), 2022-11-24
Supplement: Data_Sheet_2.pdf [file Data_Sheet_2.pdf]

*Supplementary Material*

**Cultivable Endophytic Fungal Community**

**Associated with The Karst Endemic Plant *Nervilia fordii***

**and Their Antimicrobial Activity**

**Ya-Qin Zhou<sup>1,2†</sup>, Shao-Chang Yao<sup>1†</sup>, Jie Wang<sup>1,3</sup>, Xin-Yi Xie<sup>1</sup>, Xiao-Ming Tan<sup>1\*</sup>, Rong-Shao Huang<sup>1</sup>, Xin-Feng Yang<sup>1</sup>, Yong Tan<sup>1</sup>, Li-Ying Yu<sup>2</sup> and Peng Fu<sup>1,3</sup>**

<sup>1</sup> College of Pharmacy, Guangxi University of Chinese Medicine, Nanning, China

<sup>2</sup> Guangxi Key Laboratory of Medicinal Resources Conservation and Genetic Improvement, Guangxi Botanical Garden of Medicinal Plant, Nanning, China

<sup>3</sup> Guangxi Zhuang Yao Key Laboratory of Medicine, Guangxi University of Chinese Medicine, Nanning, China

**\*Correspondence:**

Xiaoming Tan (tanxm@gxcmu.edu.cn)

<sup>†</sup>These authors have contributed equally to this work.
